# Supplementary material
Source: publisher figshare collection journal article supplement (https://acs.figshare.com/ndownloader/files/7897228)
Supplement: Supplementary file 1 [file 7897228]

## Supplementary data

### **A Novel Acylated Flavonol Tetraglycoside with Inhibitory Effect on Lipid**

### **Accumulation in 3T3-L1 Cells from Lu'an GuaPian Tea and Quantification of Flavonoid Glycosides in Six Major Processing Types of Tea**

Wu-Xia **Bai**<sup>1</sup>, Chao **Wang**<sup>1</sup>, Yi-Jun **Wang**, Wen-Jun **Zheng**, Wei **Wang**, Xiao-Chun  
**Wan**, Guan-Hu **Bao** \*

Tea natural product laboratory of International Joint Lab of Tea Chemistry and Health  
effects, State Key Laboratory of Tea Plant Biology and Utilization, Anhui Agricultural  
University, Hefei, P.R. China

### **List of supporting information**

**Table S1.** Cell toxicity and inhibitory effects on lipid accumulation in 3T3-L1 cells of  
four acylated FGs (**1**, **7**, **8**, **9**)

**Table S2.** Standard curves information for quantitative analysis of FGs by UPLC

**Table S3.** Method validation information for quantitative analysis of FGs by UPLC

**Table S4.** The chemical profiles of the six major processing types of tea

**Figure S1. (A)** The HPLC analysis of Lu'an GuaPian green tea at 280 nm. (The above curve was Lu'an GuaPian green tea extracted with 80% aqueous acetone, the below was Lu'an GuaPian green tea extracted with 70% aqueous methanol). **(B)** The HPLC analysis of Lu'an GuaPian green tea at 350 nm. (The above curve was Lu'an GuaPian green tea extracted with 80% aqueous acetone, the below was Lu'an GuaPian green tea extracted with 70% aqueous methanol).

**Figure S2.** Flowchart of extraction and isolation of **1-21** from Lu'an GuaPian tea

**Figure S3.** <sup>1</sup>H NMR spectrum of compound **1**

**Figure S4.** <sup>13</sup>C NMR spectrum of compound **1**

**Figure S5.** <sup>1</sup>H -<sup>1</sup>H COSY spectrum of compound **1**

**Figure S6.** HMQC spectrum of compound **1**

**Figure S7.** HMBC spectrum of compound **1**

**Figure S8.** IR spectrum of compound **1**

**Figure S9.** UV spectrum of compound **1**

**Figure S10.** ESI-HR-MS spectrum of compound **1**

**Figure S11.** GC spectral comparison of the sugar units

**Figure S12.** ESI-HR-MS spectrum of compound **1** and Lu'an GuaPian tea

**Table S1.** Cell toxicity and inhibitory effects on lipid accumulation in 3T3-L1 cells offour acylated FGs (**1**, **7**, **8**, **9**)

| compounds          | concentration | inhibition rate (%) | lipid content (%) |
|--------------------|---------------|---------------------|-------------------|
| <b>1</b>           | 100 $\mu$ M   | $6.72 \pm 0.79$     | $44.61 \pm 2.08$  |
|                    | 50 $\mu$ M    | $6.62 \pm 1.07$     | $55.53 \pm 1.34$  |
|                    | 25 $\mu$ M    | $5.25 \pm 0.93$     | $58.17 \pm 1.98$  |
| <b>7</b>           | 100 $\mu$ M   | $7.88 \pm 1.26$     | $43.46 \pm 2.31$  |
|                    | 50 $\mu$ M    | $7.67 \pm 0.67$     | $58.82 \pm 3.17$  |
|                    | 25 $\mu$ M    | $5.88 \pm 0.82$     | $57.47 \pm 1.14$  |
| <b>8</b>           | 100 $\mu$ M   | $8.57 \pm 1.33$     | $65.67 \pm 2.25$  |
|                    | 50 $\mu$ M    | $6.77 \pm 1.08$     | $68.03 \pm 3.02$  |
|                    | 25 $\mu$ M    | $5.61 \pm 0.53$     | $71.43 \pm 1.47$  |
| <b>9</b>           | 100 $\mu$ M   | $9.10 \pm 0.78$     | $44.45 \pm 2.33$  |
|                    | 50 $\mu$ M    | $7.20 \pm 1.16$     | $47.91 \pm 1.52$  |
|                    | 25 $\mu$ M    | $6.88 \pm 1.21$     | $55.37 \pm 2.10$  |
| <b>taxol</b>       | 10 $\mu$ M    | $90.86 \pm 3.04$    |                   |
| <b>resveratrol</b> | 88 $\mu$ M    |                     | $40.35 \pm 2.13$  |

**Table S2.** Standard curves information for quantitative analysis of FGs by UPLC

| FGs                                                  | standard curves              | linear correlations ( $R^2$ ) | linear range ( $\mu\text{g/ml}$ ) |
|------------------------------------------------------|------------------------------|-------------------------------|-----------------------------------|
| Vitexin 4"-O-Glu ( <b>20</b> )                       | $y = 5\text{E}+06x - 1628.5$ | 0.9993                        | 1.375-22                          |
| Q 3-O-Glu-Rha-Glu ( <b>16</b> )                      | $y = 3\text{E}+06x - 15457$  | 0.9970                        | 12.500-200                        |
| K 3-O-Glu-Rha-Glu ( <b>10</b> )                      | $y = 4\text{E}+06x - 10674$  | 0.9992                        | 13.438-430                        |
| K 3-O-Glu-Rha ( <b>17</b> )                          | $y = 5\text{E}+06x - 6477.1$ | 0.9991                        | 2.438-78                          |
| K 3-O-Glu ( <b>21</b> )                              | $y = 2\text{E}+07x - 5947.1$ | 0.9989                        | 0.563-18                          |
| Q 3-O- <i>p</i> -Cou-Glu-Ara-Rha-Glu<br>( <b>9</b> ) | $y = 2\text{E}+06x - 122.7$  | 0.9998                        | 0.781-50                          |
| K 3-O- <i>p</i> -Cou-Glu-Ara-Rha-Glu<br>( <b>1</b> ) | $y = 1\text{E}+06x - 250.94$ | 0.9990                        | 1.281-82                          |
| Q 3-O- <i>p</i> -Cou-Glu-Rha-Glu ( <b>8</b> )        | $y = 8\text{E}+06x - 2567.3$ | 0.9995                        | 0.688-44                          |
| K 3-O- <i>p</i> -Cou-Glu-Rha-Glu ( <b>7</b> )        | $y = 5\text{E}+06x - 355.26$ | 0.9998                        | 0.156-20                          |

**Table S3.** Method validation information for quantitative analysis of FGs by UPLC

| FGs                                                  | Precision<br>(RSD/%) | Repeatability<br>(RSD/%) | Stability<br>(RSD/%) | LOD<br>(ng) | LOQ<br>(ng) | Recovery |         |
|------------------------------------------------------|----------------------|--------------------------|----------------------|-------------|-------------|----------|---------|
|                                                      |                      |                          |                      |             |             | %        | (RSD/%) |
| Vitexin 4"-O-Glu ( <b>20</b> )                       | 0.48                 | 2.58                     | 1.29                 | 0.05        | 0.17        | 106.36   | 1.20    |
| Q 3-O-Glu-Rha-Glu ( <b>16</b> )                      | 0.76                 | 1.70                     | 3.86                 | 0.61        | 2.04        | 107.57   | 0.63    |
| K 3-O-Glu-Rha-Glu ( <b>10</b> )                      | 0.49                 | 0.30                     | 2.62                 | 0.47        | 1.55        | 99.84    | 0.03    |
| K 3-O-Glu-Rha ( <b>17</b> )                          | 2.04                 | 3.06                     | 2.45                 | 0.10        | 0.32        | 94.71    | 2.71    |
| K 3-O-Glu ( <b>21</b> )                              | 0.57                 | 1.38                     | 1.61                 | 0.02        | 0.08        | 100.91   | 1.19    |
| Q 3-O- <i>p</i> -Cou-Glu-Ara-Rha-Glu<br>( <b>9</b> ) | 2.74                 | 3.23                     | 3.71                 | 0.09        | 0.28        | 101.12   | 3.98    |
| K 3-O- <i>p</i> -Cou-Glu-Ara-Rha-Glu<br>( <b>1</b> ) | 0.72                 | 3.21                     | 3.88                 | 0.15        | 0.49        | 107.80   | 1.96    |
| Q 3-O- <i>p</i> -Cou-Glu-Rha-Glu ( <b>8</b> )        | 0.21                 | 1.85                     | 4.17                 | 0.12        | 0.39        | 103.89   | 5.48    |
| K 3-O- <i>p</i> -Cou-Glu-Rha-Glu ( <b>7</b> )        | 2.56                 | 2.69                     | 5.36                 | 0.05        | 0.17        | 98.47    | 3.52    |

**Table S4.** The chemical profiles of the six major processing types of tea

| Tea           | GC      | CAF      | EGC     | C      | EC      | EGCG    | GCG    | ECG     | CG     |
|---------------|---------|----------|---------|--------|---------|---------|--------|---------|--------|
| <b>Green</b>  | 2.616   | 35.634 ± | 34.783± | 3.646± | 13.649± | 74.666± | 3.79±  | 23.385± | 0.397± |
|               | ±0.085  | 0.217    | 0.698   | 0.065  | 0.284   | 0.985   | 0.018  | 0.407   | 0.034  |
| <b>White</b>  | 0.737 ± | 35.298±  | 9.942±  | 2.561± | 4.639±  | 43.432± | 2.731± | 16.06±  | 1.355± |
|               | 0.482   | 1.384    | 0.756   | 0.224  | 0.639   | 3.606   | 0.24   | 1.558   | 0.417  |
| <b>Yellow</b> | 1.423 ± | 34.104±  | 30.745± | 3.529± | 12.079± | 63.724± | 3.587± | 22.591± | 0.429± |
|               | 0.037   | 0.384    | 1.085   | 0.151  | 0.464   | 2.529   | 0.146  | 0.902   | 0.042  |
| <b>Oolong</b> | 1.888 ± | 33.428±  | 20.347± | 3.043± | 8.399±  | 39.95±  | 2.658± | 12.618± | 0.827± |
|               | 0.059   | 0.346    | 0.646   | 0.057  | 0.226   | 0.158   | 0.007  | 0.115   | 0.178  |
| <b>Black</b>  | 0.454 ± | 31.229±  | 0.377±  | 1.117± | 0.569±  | 2.282±  | 3.168± | 1.747±  | 0.572± |
|               | 0.078   | 1.646    | 0.092   | 0.089  | 0.092   | 0.286   | 0.145  | 0.116   | 0.27   |
| <b>Dark</b>   | 2.106 ± | 34.186±  | 20.492± | 1.562± | 8.946±  | 15.566± | 1.26±  | 6.404±  | 0.393± |
|               | 0.211   | 1.91     | 1.557   | 0.138  | 0.885   | 1.573   | 0.033  | 0.544   | 0.013  |

GC: (+)-Gallocatechin; CAF: caffeine; EGC: (-)-epigallocatechin; C: (+)-catechin; EC: (-)-epicatechin; EGCG: (-)-epigallocatechin-3-*O*-gallate; GCG: (-)-gallocatechin-3-*O*-gallate; ECG: (-)-epicatechin-3-*O*-gallate; CG: (-)-catechin-3-*O*-gallate

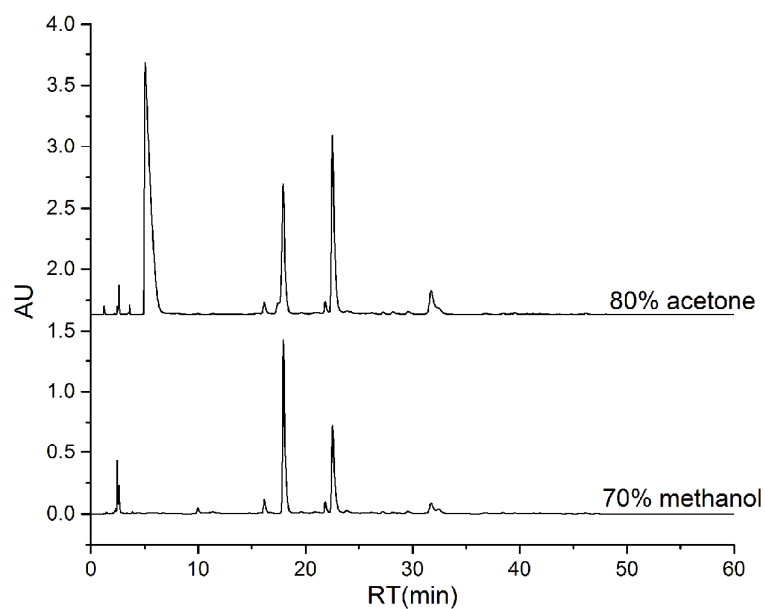

**Figure S1A.** The HPLC analysis of Lu'an GuaPian green tea at 280 nm. (The above curve was Lu'an GuaPian green tea extracted with 80% aqueous acetone, the below was Lu'an GuaPian green tea extracted with 70% aqueous methanol).

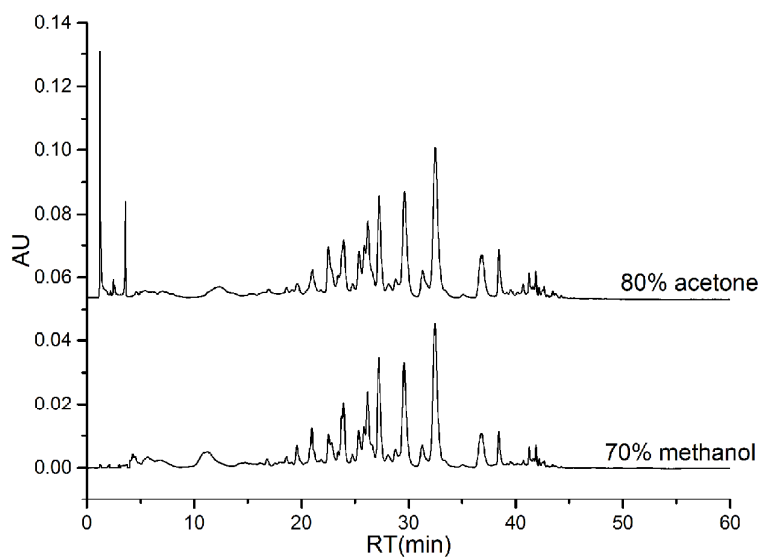

**Figure 1B.** The HPLC analysis of Lu'an GuaPian green tea at 350 nm. (The above curve was Lu'an GuaPian green tea extracted with 80% aqueous acetone, the below was Lu'an GuaPian green tea extracted with 70% aqueous methanol).

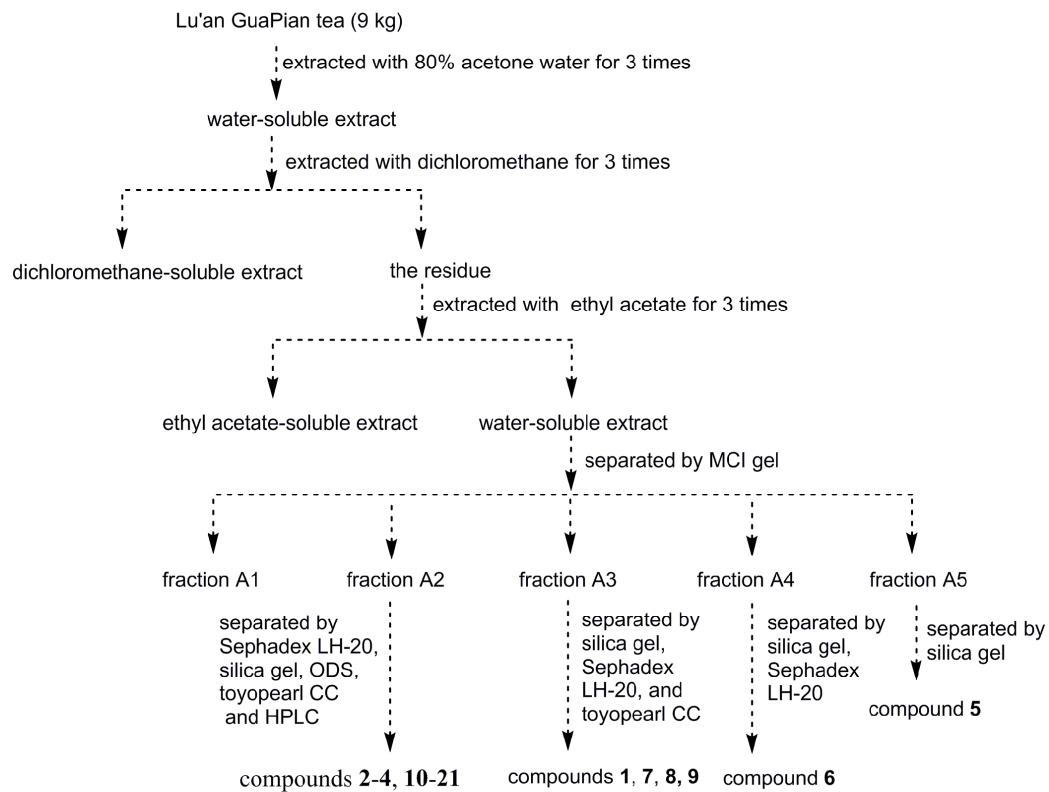

**Figure S2.** Flowchart of extraction and isolation of **1-21** from Lu'an GuaPian tea



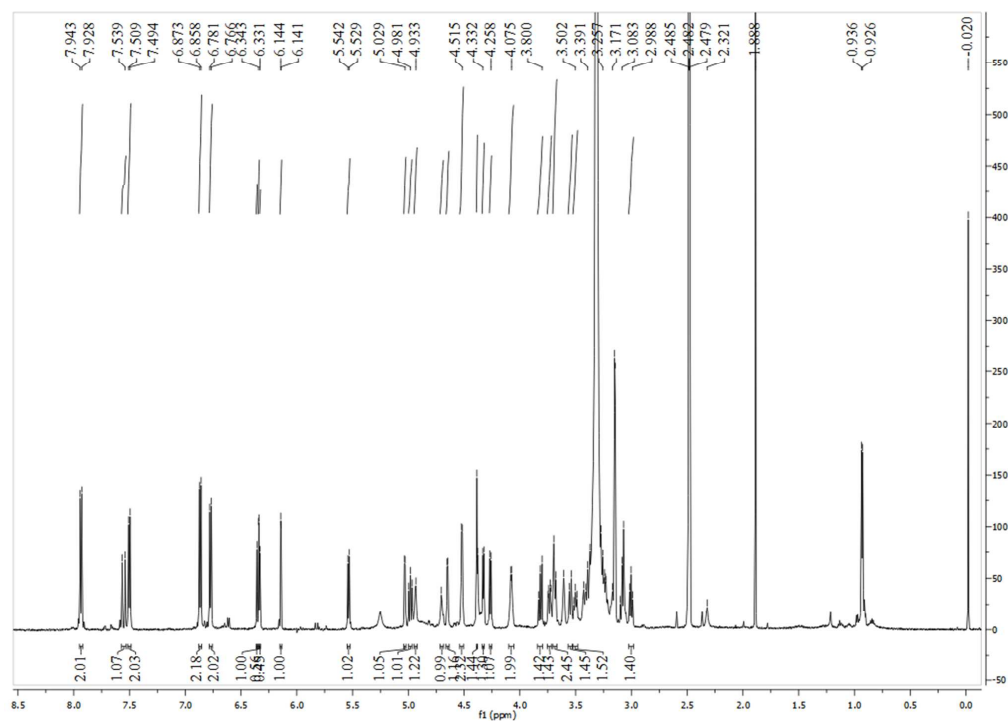

Figure S3. <sup>1</sup>H NMR spectrum of compound 1

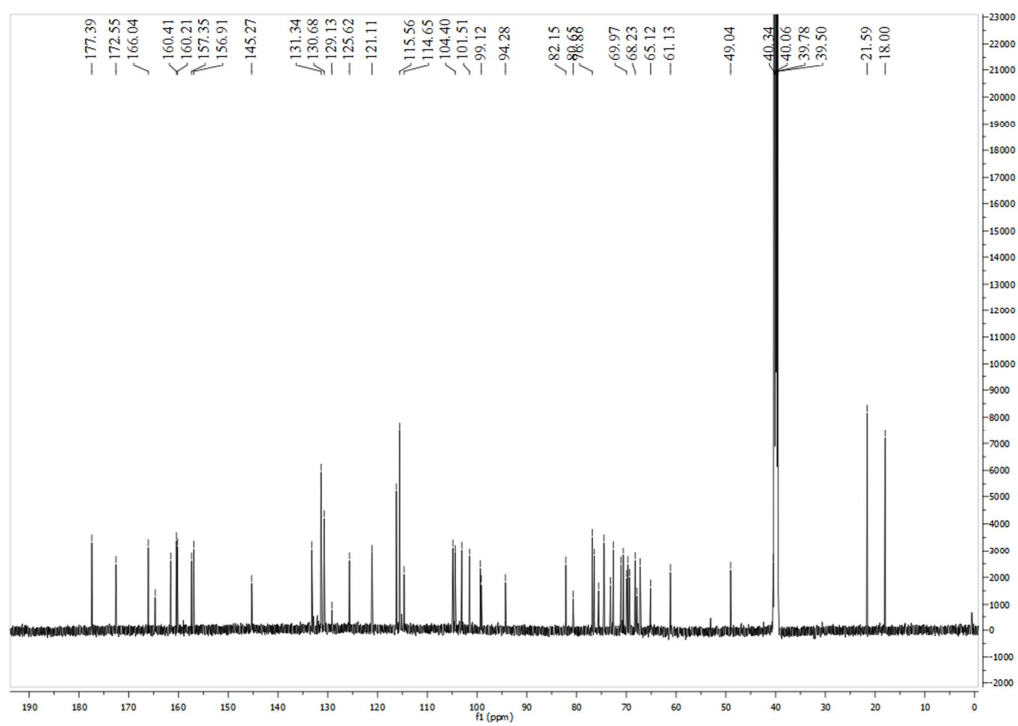

**Figure S4.**  $^{13}\text{C}$  NMR spectrum of compound **1**

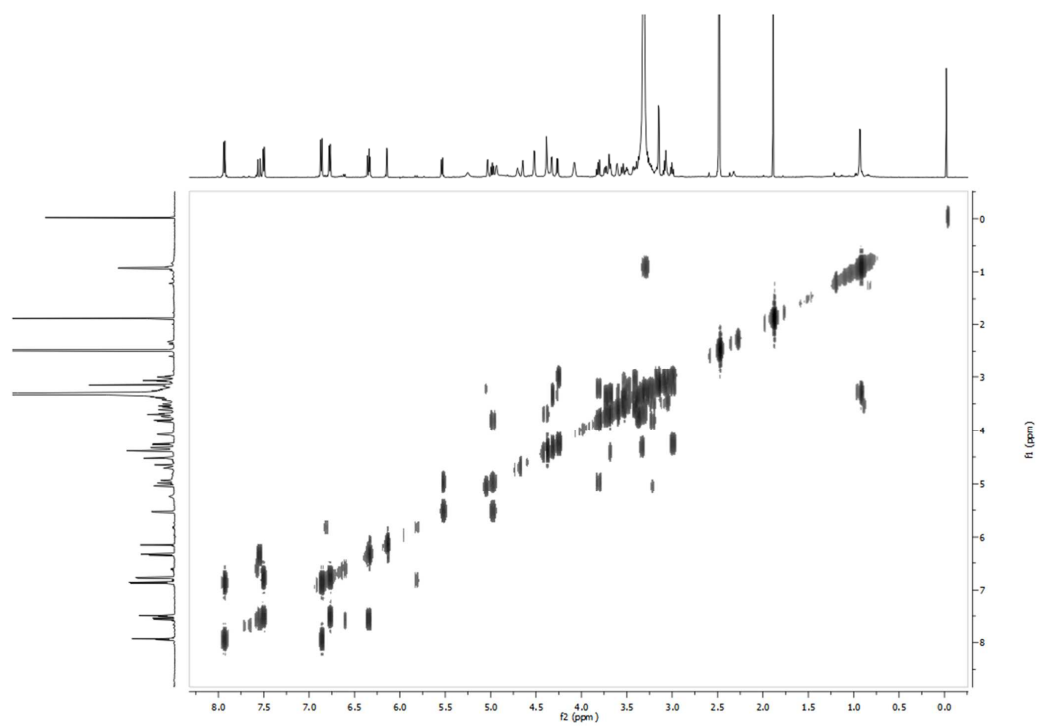

**Figure S5.**  $^1\text{H}$ - $^1\text{H}$  COSY spectrum of compound **1**

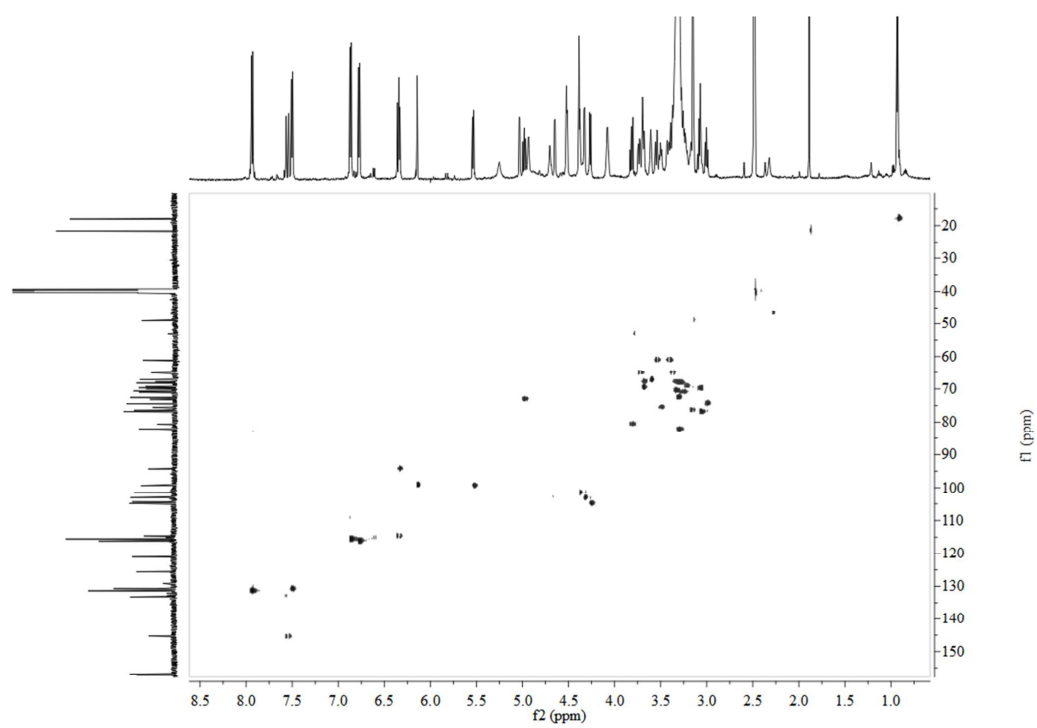

**Figure S6.** HMQC spectrum of compound **1**

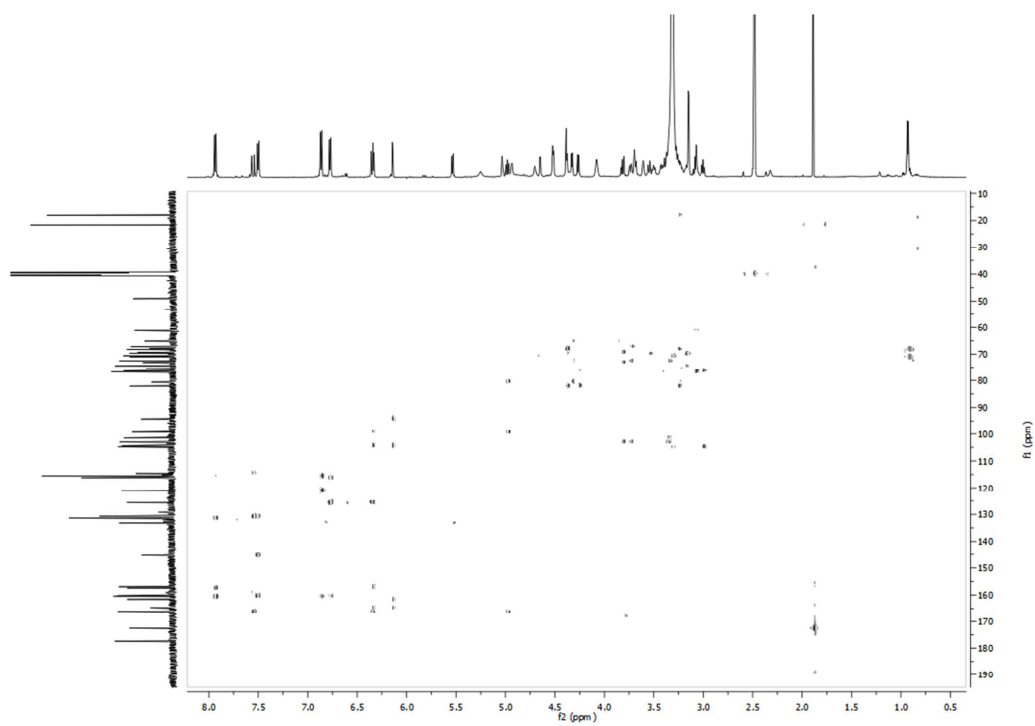

**Figure S7.** HMBC spectrum of compound **1**

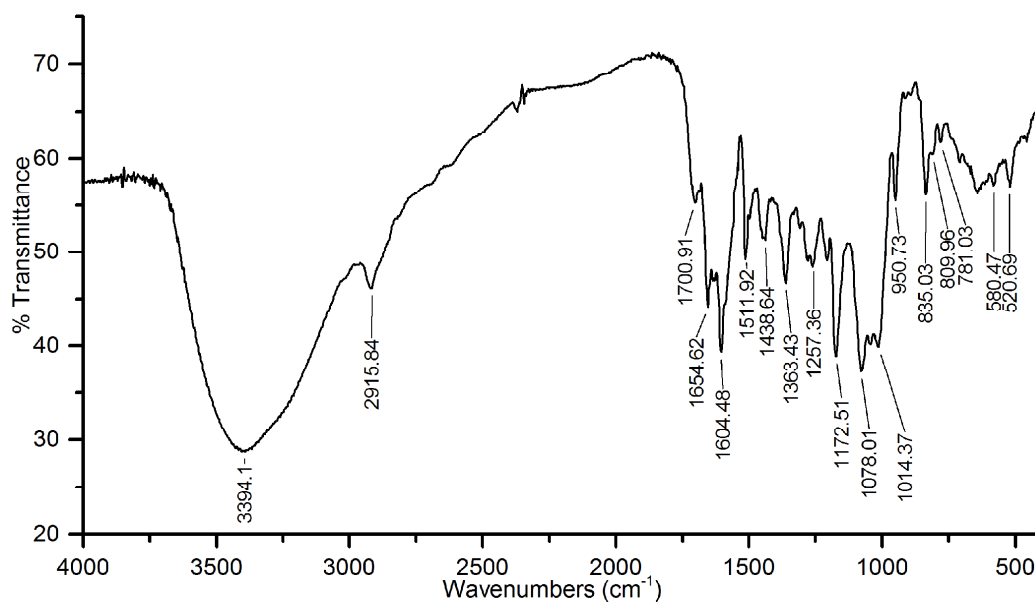

**Figure S8.** IR spectrum of compound **1**

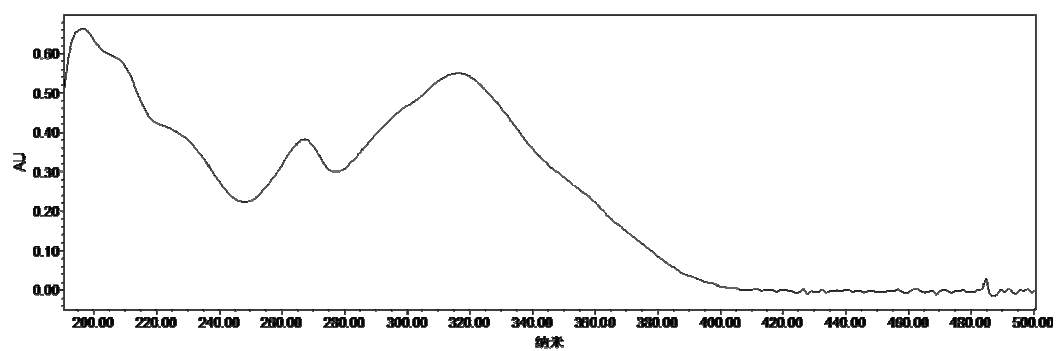

Figure S9. UV spectrum of compound 1

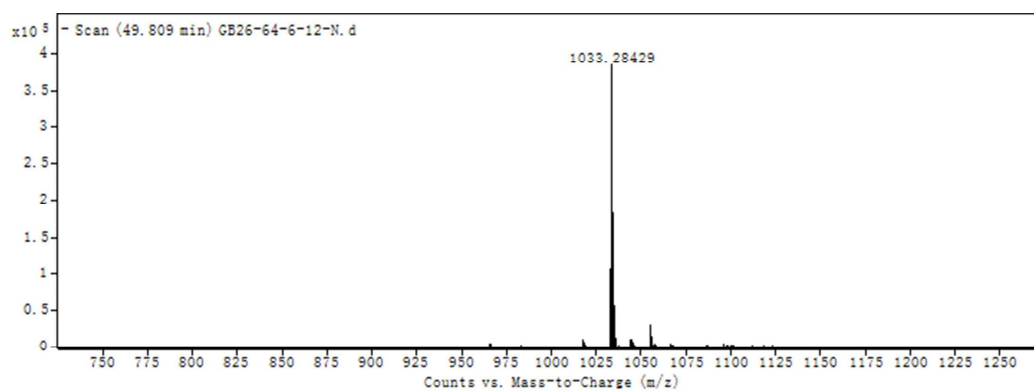

**Figure S10.** ESI-HR-MS<sup>-</sup> spectrum of compound **1**



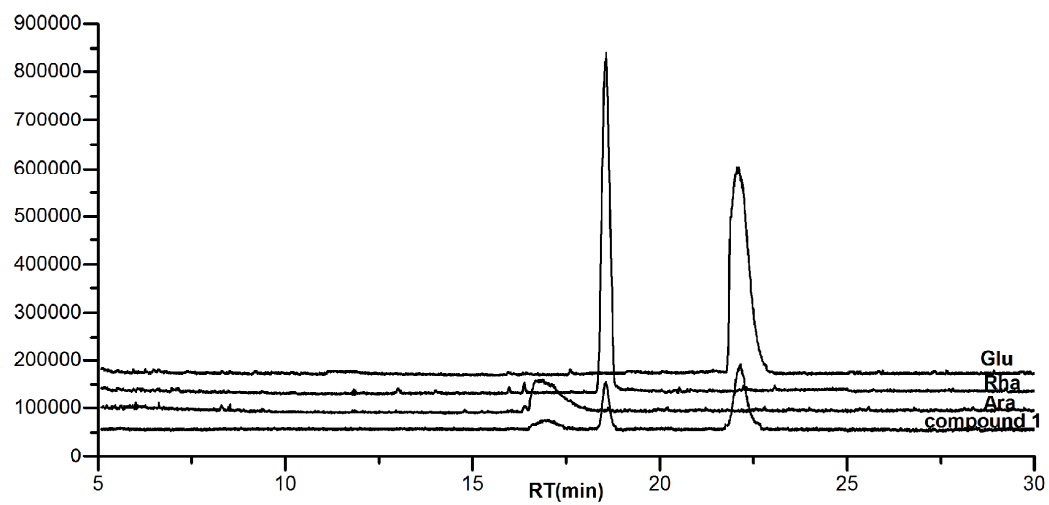

**Figure S11.** GC spectral comparison of the sugar units (The cruve from above to below were D-glucose (Glu), L-rhamnose (Rha), L-arabinose (Ara) and compound 1.)

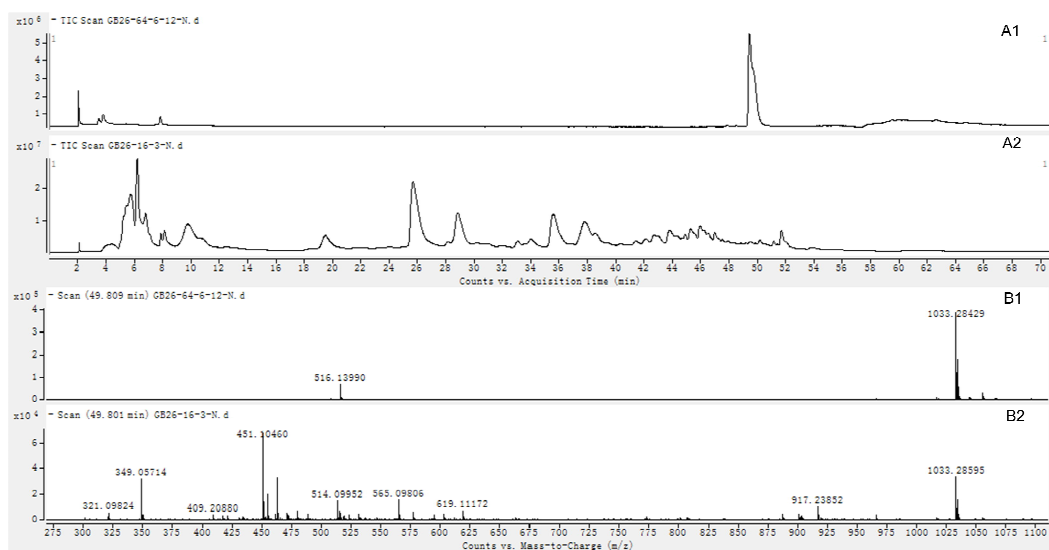

**Figure S12.** ESI-HR-MS<sup>-</sup> spectrum of compound **1** and Lu'an GuaPian tea (A1:Lu'an GuaPian tea detected with ESI-HR-MS; A2:compound **1** detected with ESI-HR-MS<sup>-</sup>; B1:Mass spectra of compound **1** at 49.8 min; B2:Mass spectra of Lu'an GuaPian tea, the peak we detected at 49.8 min had the same  $m/z$  1033.28 with compound **1**.)
